# Supplementary material for: Conversion of CO2 on a highly active and stable Cu/FeOx/CeO2 catalyst: tuning catalytic performance by oxide-oxide interactions
Source: Royal Society of Chemistry journal article supplement (doi:10.1039/c9cy00722a), 2019-01-01
Supplement: c9cy00722a1.pdf [file c9cy00722a1.pdf]

Supporting Information

**Conversion of CO<sub>2</sub> on a Highly Active and Stable Cu/FeOx/CeO<sub>2</sub>  
Catalyst: Tuning Catalytic Performance by Oxide-Oxide Interactions**

Lili Lin<sup>a</sup>, Siyu Yao<sup>a</sup>, Ning Rui<sup>a</sup>, Lili Han<sup>b</sup>, Feng Zhang<sup>c</sup>, Clifford Gerlak<sup>a</sup>, Zongyuan Liu<sup>a</sup>, Jiajie Cen<sup>c</sup>, Liang Song<sup>c</sup>, Sanjaya Senanayake<sup>a</sup>, Huolin L. Xin<sup>b</sup>, Jingguang G. Chen<sup>a</sup>, José A. Rodríguez<sup>\*acd</sup>

<sup>a</sup> Chemistry Department, Brookhaven National Laboratory, Upton, New York 11973, United States

<sup>b</sup> Department of Physics and Astronomy, University of California, Irvine, CA 92697, USA.

<sup>c</sup> Materials Science and Chemical Engineering Department, State University of New York at Stony Brook, New York, 11794, United States

<sup>d</sup> Department of Chemistry, State University of New York at Stony Brook, New York 11794, United States

## Supplementary Tables and Figures

**Table S1. The physicochemical properties of 5Cu<sub>x</sub>Fe/CeO<sub>2</sub> catalysts**

| Sample                    | Cu loading  | Fe loading  | BET surface area (m <sup>2</sup> /g) |
|---------------------------|-------------|-------------|--------------------------------------|
| CeO <sub>2</sub>          | --          | --          | 40                                   |
| 5Cu/CeO <sub>2</sub>      | 5.26+/-0.01 | --          | 39                                   |
| 5Cu0.8Fe/CeO <sub>2</sub> | 4.91+/-0.04 | 0.76+/-0.01 | 40                                   |
| 5Cu1.6Fe/CeO <sub>2</sub> | 5.43+/-0.03 | 1.59+/-0.01 | 42                                   |
| 5Cu3.2Fe/CeO <sub>2</sub> | 5.01+/-0.02 | 3.00+/-0.01 | 40                                   |
| 5Cu5Fe/CeO <sub>2</sub>   | 4.93+/-0.01 | 4.23+/-0.01 | 38                                   |
| 1.6Fe/CeO <sub>2</sub>    | --          | 1.57+/-0.01 | 41                                   |

**Table S2. The affiliation of the major diffraction peaks and related crystal phase of Fe and Cu species<sup>a</sup>.**

| Species                          | Diffraction peaks <sup>a</sup> (related crystal phase) |             |
|----------------------------------|--------------------------------------------------------|-------------|
| Fe                               | 6.82 (110)                                             | 9.65 (200)  |
| FeO                              | 5.56 (110)                                             | 6.41 (11-1) |
| Fe <sub>3</sub> O <sub>4</sub>   | 4.66 (220)                                             | 5.46 (311)  |
| Fe <sub>2</sub> O <sub>3</sub>   | 5.12 (104)                                             | 5.49 (2-10) |
| CuFe <sub>2</sub> O <sub>4</sub> | 5.72 (202)                                             | 6.74 (220)  |
| Cu                               | 6.59 (111)                                             | 7.65 (200)  |
| CuO                              | 5.47 (002)                                             | 5.97 (111)  |

a. the incident X-ray wavelength was 0.24121 Å.

When the temperature increases during XRD data collection, the lattice thermal expansion will happen and cause the shift of the diffraction peaks shifting to lower  $2\theta$ . The peak centered at 5.49° was used to determine the diffraction of Fe<sub>2</sub>O<sub>3</sub>, as the strongest line was overlapped by the one of the peaks of CeO<sub>2</sub>. So the peak centered at 5.44 ° appeared at 180 °C was attributed the diffraction of Fe<sub>2</sub>O<sub>3</sub> species.

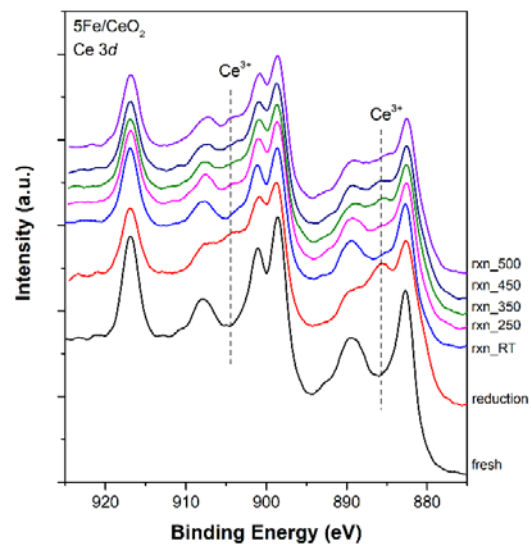

**Figure S1.** AP-XPS characterization of Ce 3d profiles of 5Cu1.6Fe/CeO<sub>2</sub> catalyst under varied conditions.

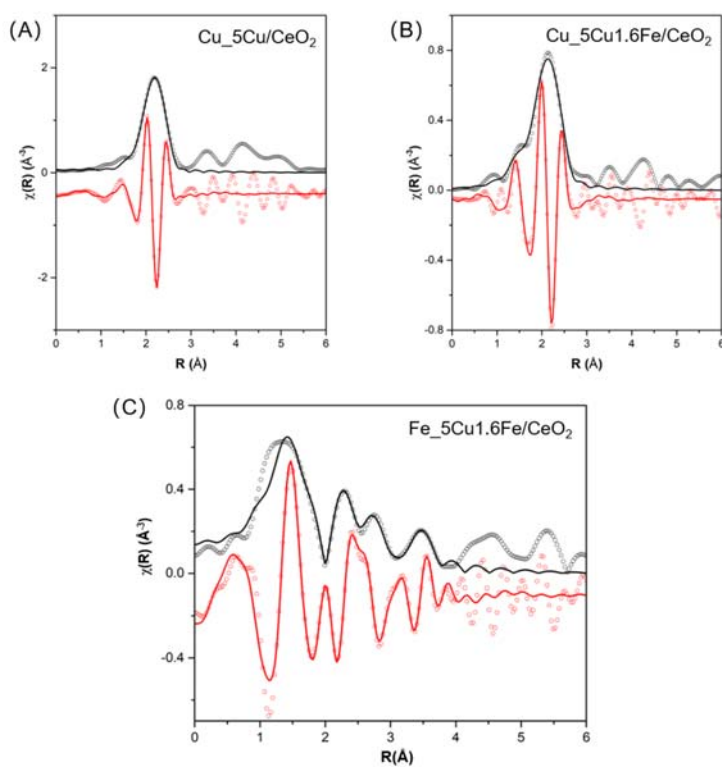

**Figure S2.** The EXAFS fitting results in R space of the (A) 5Cu/CeO<sub>2</sub>; (B) 5Cu1.6Fe/CeO<sub>2</sub> in Cu K edge and (C) 5Cu1.6Fe/CeO<sub>2</sub> in Fe K edge. The black line and dot are the R magnitude spectra while the red ones are the R real spectra.

**Table S3. The EXAFS fitting results of Cu K edge and Fe K edge of Cu5Fe1.6/CeO<sub>2</sub> catalyst.**

| Edge      | Sample                         | Shell     | Bond length (Å) | Coordination | $\sigma^2$ | E <sub>0</sub> shift |
|-----------|--------------------------------|-----------|-----------------|--------------|------------|----------------------|
| Cu K      | 5Cu/CeO <sub>2</sub>           | Cu-Cu     | 2.52±0.01       | 9.0+/-0.9    | 0.011      | 0.8                  |
|           | 5Cu1.6Fe/CeO <sub>2</sub> -RED | Cu-Cu     | 2.50±0.01       | 5.3+/-0.4    | 0.015      | 0.1                  |
|           | 5Cu1.6Fe/CeO <sub>2</sub> -RXN | Cu-Cu     | 2.50±0.03       | 5.3+/-0.8    | 0.015      | -0.4                 |
| Fe K edge | 5Cu1.6Fe/CeO <sub>2</sub> -RXN | Fe-O      | 1.96±0.03       | 2.2+/-0.5    | 0.008      | 3.2                  |
|           |                                | Fe-O      | 2.16±0.04       | 2.2+/-0.6    | 0.008      |                      |
|           |                                | Fe-Fe(Cu) | 2.52±0.02       | 1.6+/-0.2    | 0.009      |                      |
|           |                                | Fe-(O)-Fe | 3.13±0.02       | 1.2+/-0.3    | 0.009      |                      |
|           |                                | Fe-(O)-Fe | 3.66±0.02       | 0.4+/-0.1    | 0.009      |                      |
|           |                                | Fe-Ce     | 3.83±0.04       | 0.3+/-0.2    | 0.005      |                      |

**Table S4. The linear combination of Fe<sub>2</sub>O<sub>3</sub>, Fe<sub>3</sub>O<sub>4</sub>, FeO and Fe species in the 5Cu1.6Fe/CeO<sub>2</sub> catalyst under reaction condition**

| Catalyst                       | Fe <sub>2</sub> O <sub>3</sub> | Fe <sub>3</sub> O <sub>4</sub> | FeO        | Fe |
|--------------------------------|--------------------------------|--------------------------------|------------|----|
| 5Cu1.6Fe/CeO <sub>2</sub> -rxn | 31.4+/-3.5                     | 24.2+/-3.9                     | 45.6+/-0.7 | 0  |

**The necessary of including the Fe-Ce shell in the fitting of 5Cu1.6Fe/CeO<sub>2</sub> catalysts**

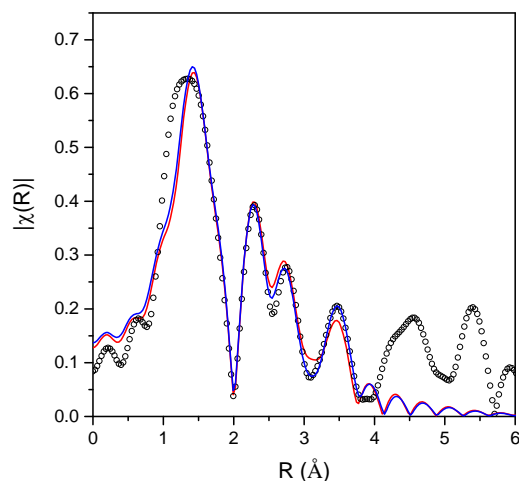

**Figure S3.** The comparison of the fitting results in R space of the one without Fe-Ce shell (red) and with Fe-Ce shell (blue).

As shown in the Figure S3, it could be seen that if the Fe-Ce shell is not included in the fitting of the Fe K edge spectrum, the quality of the fitting in the range of 3-4 Å will get worse. In the meantime, the fitting parameters of

the longest Fe-Fe shell became meaningless when there is no Fe-Ce path in the fitting, such as the negative  $\sigma^2$  value. This phenomenon suggests that the Fe-Ce and Fe-Fe shells are correlating shells that should both be included in the fitting processes.

**Table S5. The Fe-Fe parameter comparison of the fitting with Fe-Ce and without Fe-Ce path**

|               | Bond length | Amplitude | $\sigma^2$    | E0 shift |
|---------------|-------------|-----------|---------------|----------|
| Without Fe-Ce | 3.67        | 0.07      | <b>-0.002</b> | 4.0      |
| With Fe-Ce    | 3.66        | 0.10      | 0.003         | 3.2      |

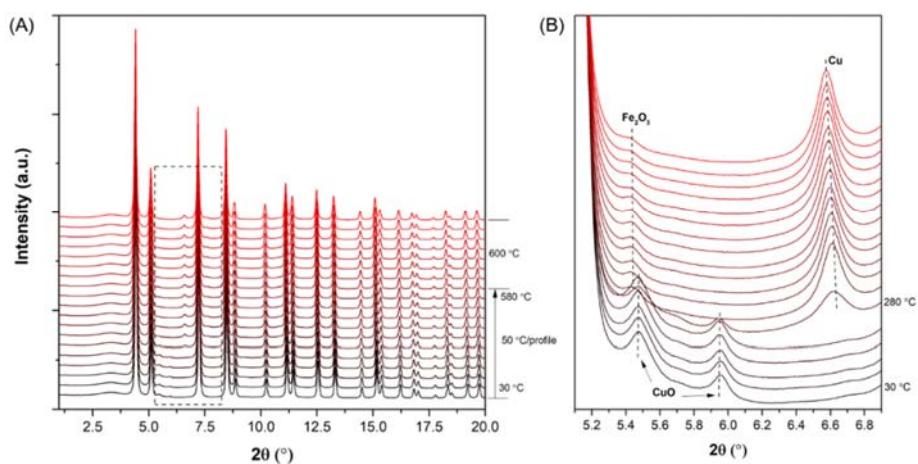

**Figure S4.** The crystal phase evolution of **(A)** 5Cu1.6Fe/CeO<sub>2</sub> in the reaction atmosphere (CO<sub>2</sub>:H<sub>2</sub>=1:1) from room temperature, **(B)** the enlarged figure of Figure A in dash square from 5.1 to 6.9°.
